1 **Title: Sleep and memory consolidation are linked by RNA processing**  
2 **genes in the *Drosophila* mushroom body**

3 Yongjun Li<sup>1, 2, \*</sup>, Nitin S. Chouhan<sup>1, 4 \*</sup>, Shirley Zhang<sup>1, 5</sup>, Rebecca S. Moore<sup>1</sup>, Joy Shon<sup>1</sup>,  
4 Zhifeng Yue<sup>1</sup>, Amita Sehgal<sup>1</sup>

5 <sup>1</sup>Howard Hughes Medical Institute and Chronobiology and Sleep Institute, Perelman School of Medicine at the University of  
6 Pennsylvania, Philadelphia, PA 19104, United States

7 <sup>2</sup>Department of Biology, University of Pennsylvania, PA 19104, United States

8 <sup>3</sup>Department of Pharmacology, Perelman School of Medicine at the University of Pennsylvania, Philadelphia, PA 19104, United  
9 States

10 <sup>4</sup>Current address: Department of Biological Sciences, Tata Institute of Fundamental Research, Mumbai 400005, India

11 <sup>5</sup>Current address: Department of Cell Biology, Emory University School of Medicine, Atlanta GA 3032

12 \*Equal contribution

13 Correspondence should be addressed to Amita Sehgal at [amita@penncmedicine.upenn.edu](mailto:amita@penncmedicine.upenn.edu)

14 **Keywords**

15 Sleep, memory consolidation, translation, ribosomal RNA, mushroom body

16

17 **Abstract**

18 Memory consolidation in *Drosophila* can be sleep-dependent or sleep-  
19 independent, depending on the availability of food. Different regions of the mushroom  
20 body (MB) mediate these two mechanisms, with the ap  $\alpha'/\beta'$  neurons required for sleep-  
21 dependent memory consolidation in flies that are fed after training. These neurons are  
22 also involved in the increase of sleep after training, suggesting a link between sleep and  
23 memory. To better understand the mechanisms underlying sleep and memory  
24 consolidation initiation, we analyzed the transcriptome of ap  $\alpha'/\beta'$  neurons one hour after  
25 appetitive memory conditioning. A small number of genes were differentially expressed  
26 specifically in flies fed after training, but not in trained and starved flies or untrained flies.  
27 Knockdown of each of these differentially expressed genes in the ap  $\alpha'/\beta'$  neurons  
28 revealed multiple genes that affect sleep, with notable effects observed for Polr1F and  
29 Regnase-1, both of which decrease in expression after conditioning. Knockdown of  
30 Polr1F, a regulator of ribosome RNA transcription, in adult flies promotes sleep and  
31 increases pre-ribosome RNA expression as well as overall translation, supporting a  
32 function for Polr1F downregulation in memory consolidation. Conversely, knockdown of  
33 Regnase-1, an mRNA decay protein localized to the ribosome, reduces sleep. Given  
34 that Regnase-1 knockdown in ap  $\alpha'/\beta'$  neurons affects both sleep-dependent and sleep-  
35 independent memory, as well as short-term memory, Regnase-1 likely has an early role  
36 in the learning process, which may obscure a later function for its downregulation during

37 sleep-dependent memory. These findings indicate that changes in RNA processing play  
38 a crucial role in triggering post-training sleep and memory consolidation.

39

## 40 **Background**

41 Sleep is an optimized state for memory consolidation compared to wake (Rasch  
42 and Born, 2013). Indeed, sleep is thought to reorganize and strengthen the neural  
43 connections required for novel memory formation and long-term memory consolidation,  
44 and sleep disruption leads to impaired memory consolidation (Roselli et al., 2021).  
45 Beneficial effects of sleep on memory have also been attributed to post-learning  
46 neuronal reactivation (Wagner et al., 2007; Dag et al., 2019).

47 We recently demonstrated that *Drosophila* switch between sleep-dependent and  
48 sleep-independent memory consolidation based on food availability (Chouhan et al.,  
49 2021). Flies that are fed after appetitive conditioning show sleep-dependent memory  
50 consolidation, which is mediated by the anterior posterior (ap)  $\alpha'/\beta'$  neurons of the  
51 mushroom body. On the other hand, flies starved after training display sleep-  
52 independent memory mediated by medial (m) neurons of the  $\alpha'/\beta'$  lobes.  
53 Neurotransmission from ap  $\alpha'/\beta'$  neurons in the first 4 hours after training in the fed flies  
54 is not only required for long term memory but also increased sleep post-training.  
55 Activation of ap  $\alpha'/\beta'$  neurons also promotes baseline sleep, supporting the idea that  
56 post training sleep is triggered by the same neurons that are required for sleep-  
57 dependent memory consolidation. However, how sleep and memory consolidation are  
58 coordinated in ap  $\alpha'/\beta'$  neurons in this time window is not understood.

59            Since both post-training sleep and memory consolidation occur rapidly within a  
60            few hours after training, we investigated transient gene expression changes in the ap  
61             $\alpha'/\beta'$  neurons after training to elucidate the interplay of sleep and memory consolidation.  
62            Here, we profiled the transcriptome of ap  $\alpha'/\beta'$  neurons 1 hour after flies were fed and  
63            trained, as well as under control conditions in which flies were starved and trained or fed  
64            and untrained. We knocked down the differentially expressed genes in trained and fed  
65            flies and identified two RNA processing genes that affect sleep. Knockdown of one of  
66            these, Polr1F, a regulator of ribosomal RNA synthesis, promotes sleep and translation,  
67            both of which are required for consolidation of memory in trained and fed flies.  
68            Knockdown of Polr1F does not affect memory, which is consistent with downregulation  
69            of this gene during memory consolidation. Knockdown of Regnase-1, an mRNA decay  
70            protein, reduces sleep and disrupts short and long term memory, suggesting an early  
71            role, perhaps in learning. These results suggest that RNA processing is an important  
72            mechanism linking sleep to memory.

## 73 **Results**

### 74 **Transient transcriptome profiling of ap $\alpha'/\beta'$ neurons after training**

75 We previously demonstrated that flies fed after appetitive memory training exhibit  
76 increased sleep and form sleep-dependent memory, which is mediated by ap  $\alpha'/\beta'$   
77 neurons of the mushroom body (MB)  $\alpha'/\beta'$  lobes (Chouhan et al., 2021). To address the  
78 mechanisms that mediate increases in sleep and consolidation of memory in ap  $\alpha'/\beta'$   
79 neurons, we assayed gene expression changes in ap  $\alpha'/\beta'$  neurons of flies fed after  
80 training in an appetitive conditioning paradigm. We crossed ap  $\alpha'/\beta'$  neuron driver  
81 *R35B12-Gal4* (BDSC #49822) with *UAS-nGFP* (BDSC #4775) to label all ap  $\alpha'/\beta'$   
82 neurons with nuclear GFP and collected 5-7 day old F1 progeny subjected to three  
83 different conditions: Trained-Fed, Trained-Starved, Untrained-Fed as illustrated (**Figure**  
84 **1A**). The trained-starved flies served as controls for sleep-dependent changes, while  
85 flies that were fed but untrained served as controls for training-dependent changes.  
86 After one-hour, 50 mixed sex (25 for each sex) fly brains from each condition were  
87 dissected, and 500 GFP+ cells were sorted for bulk-RNA sequencing using the protocol  
88 described by Hongjie Li et al (Li et al., 2017).

89 Our analysis of the bulk RNA-seq data revealed that most genes are not altered  
90 in ap  $\alpha'/\beta'$  neurons after one hour, so there are no significant global changes observed  
91 among the three conditions. The correlation matrix calculated using the top 75% genes  
92 showed high similarity between samples, with most values exceeding 0.9 (**Figure 1 –**  
93 **source data 1**). Nonetheless, we did observe a small subset of genes that were rapidly  
94 responsive and differentially expressed between the groups. Principal component  
95 analysis (PCA) of these differentially expressed genes (DEGs) indicated that samples

96 from different conditions are separable, and pathway analysis of PCA indicated that  
97 transcription and RNA biosynthetic processes were influenced by the training and  
98 feeding paradigm (**Figure 1B**). In total, we identified 59 DEGs, of which 56 were  
99 downregulated and only three were upregulated in the Trained-Fed condition compared  
100 to the control conditions (**Figure 1C, Figure 1 – source data 1**). Gene ontology (GO)  
101 analysis of these 59 genes using FlyEnrichr (<https://maayanlab.cloud/FlyEnrichr/>)  
102 indicated that they encode cellular components of the 90S preribosome, Cajal body,  
103 DNA-directed RNA polymerase complex, nuclear euchromatin, and condensed  
104 chromosome, consistent with the PCA enrichment (**Figure 1 – source data 1**). Our  
105 transcriptome results suggest that ribosome biosynthesis and transcription are the initial  
106 changes in ap  $\alpha'/\beta'$  neurons of trained and fed flies.

107

108 **Two genes expressed differentially in ap  $\alpha'/\beta'$  neurons of trained and fed flies**  
109 **predominately affect sleep.**

110 To investigate if any of the 59 DEGs identified in the ap  $\alpha'/\beta'$  neurons of trained  
111 and fed flies affect baseline sleep, we knocked down each of the genes using UAS-  
112 RNAi lines and screened for their potential effects on sleep. We used the ap  $\alpha'/\beta'$   
113 neuron constitutive driver R35B12-Gal4 line to drive the RNAi constructs and compared  
114 the sleep patterns of knockdown flies with those of R35B12-Gal4 and UAS-RNAi control  
115 flies (**Figure 2A, B**). Using a cutoff of a 200 min change in sleep relative to each control  
116 group, we identified two genes, Polr1F and Regnase-1, that showed significant effects  
117 on baseline sleep. Knockdown of Polr1F, a component of RNA polymerase I complex,  
118 led to an increase in sleep. Although Polr1F has not been extensively studied in

119 *Drosophila* (Marygold et al., n.d.), its human ortholog hRPA43 is part of the multi-  
120 subunit protein complex Pol I that regulates the transcription of ribosomal RNA  
121 (Beckouët et al., 2011). Knockdown of Regnase-1, an RNA-binding protein that binds to  
122 mRNA undergoing active translation and promotes mRNA decay via its ribonuclease  
123 activity, in ap  $\alpha'/\beta'$  neurons resulted in a reduction of both nighttime and daytime sleep  
124 (**Figure 2A, B**). Further analysis of sleep architecture revealed that knockdown of  
125 Polr1F and Regnase-1 did not significantly impact the total activity of flies, while  
126 knockdown of either Polr1F and Regnase-1 resulted in increased and decreased  
127 average length of sleep episodes, respectively (**Figure 2 – supplemental figure1**).

128         Given that these two genes reduce expression rapidly in response to training  
129 under fed conditions, we next used the inducible pan-neuronal GeneSwitch driver *nSyb-*  
130 *GeneSwitch* (*GS*) to determine if restricting knockdown of these two genes to the adult  
131 stage recapitulates changes in sleep and/or memory. RU486 (mifepristone) was added  
132 to normal fly food and transgene expression is induced when flies are loaded into  
133 *Drosophila* Activity Monitor (DAM) glass tubes (Robles-Murguía et al., 2019). We  
134 crossed the *nSyb-GS* flies with Polr1F or Regnase-1 RNAi flies and transferred the  
135 adult F1 progeny to RU486 tubes to induce expression of the RNAi 3-5 hours before  
136 dusk, and continuously monitored sleep for 5 days. Knockdown of Polr1F resulted in  
137 immediate inactivity and sleep (**Figure 3A-C**). However, with knockdown of Regnase-1,  
138 immediate changes in sleep were not noted (**Figure 3 – supplemental figure 1A-C**).  
139 This could be due to potential leakiness of the *nSyb-GS*, such that it reduced sleep  
140 even without RU486 treatment, coupled with the fact that sleep before dusk is already  
141 quite low. We also analyzed sleep for the next 3 consecutive days from day 3 to day 5

142 and found that constitutive pan-neuronal Polr1F knockdown increased sleep while  
143 Regnase-1 knockdown seemed to have no effect, again perhaps due to the leakiness of  
144 *nSyb-GS*. However, it is also possible that Regnase-1 affects sleep differently in  
145 different brain areas (**Figure 3D, E; Figure 3 – supplemental figure 1 D, E**). In general,  
146 these results indicate that adult specific knockdown of Polr1F promotes sleep while  
147 brain-wide adult-specific knockdown of Regnase-1 has limited effect on sleep.

148

#### 149 **Knockdown of Regnase-1 affects memory consolidation.**

150 We next evaluated the impact of Polr1F and Regnase-1 knockdown on memory  
151 consolidation using our olfactory conditioning paradigm (**Figure 4A**). Starved flies were  
152 subjected to training to associate an odor with a reward, and then post-training, they  
153 were either kept on food vials for sleep-dependent memory consolidation or kept  
154 starved to promote sleep-independent memory consolidation. Memory tests were  
155 conducted 24 hours after training for starved flies, while fed flies were restarved for 42  
156 hours before testing, as starvation is necessary for memory retrieval (Krashes and  
157 Waddell, 2008). We observed that constitutive knockdown of Polr1F in *ap α'/β'* neurons  
158 did not affect sleep-dependent or sleep-independent memory as memory performance  
159 was comparable to that of genetic controls (**Figure 4B-C**). These results were  
160 consistent with the fact that Polr1F levels typically decrease during memory  
161 consolidation. Monitoring of sleep from ZT8 to ZT12 after training at zeitgeber time (ZT)  
162 6 showed that the post-training increase in sleep was also not affected by Polr1F  
163 knockdown in *ap α'/β'* neurons (**Figure 4E**), suggesting that acute downregulation of  
164 Polr1F may not be essential to the post-training increased sleep.



165 On the other hand, Regnase-1 knockdown in ap  $\alpha'/\beta'$  neurons resulted in a  
166 significant decrease in long-term memory performance in both fed and starved flies and  
167 eliminated the increase in post-training sleep (**Figure 4 B-E**). These findings suggested  
168 that Regnase-1 expression in ap  $\alpha'/\beta'$  neurons is necessary for both sleep-dependent  
169 and sleep-independent memory consolidation or that it is required for learning or short-  
170 term memory formation. Short-term memory tests confirmed that Regnase-1 knockdown  
171 flies performed significantly worse than control flies (**Figure 4F**), indicating that  
172 Regnase-1 expression is essential for the increase in post-training sleep and for short-  
173 term memory, which precedes both sleep-dependent and sleep-independent long-term  
174 memory.

175

## 176 **Knockdown of Polr1F promotes translation**

177 Since Polr1F knockdown promotes sleep and a 22 amino acid peptide within  
178 Polr1F inhibits ribosomal DNA transcription (Rothblum et al., 2014), we predicted that  
179 Polr1F acted as a suppressor for ribosomal DNA transcription, and thus knockdown of  
180 Polr1F would enhance the transcription and translation of ribosomal RNA and thereby  
181 overall protein synthesis. As Regnase-1 is thought to promote decay of mRNAs  
182 undergoing translation, its knockdown, or its downregulation following training, might  
183 also be expected to promote translation, or at least the translation of its target mRNAs.  
184 The role of protein synthesis in long-term memory consolidation is well-established  
185 across organisms (Alberini and Kandel, 2015), and nascent rRNA synthesis was also  
186 shown to be induced by training and required for memory consolidation in mouse (Allen  
187 et al., 2018). We thus used real-time qPCR of total RNA extracted from vehicle control

188 and RU-treated fly brains to measure how precursor ribosomal RNA (Pre-rRNA) is  
189 affected by knockdown of Polr1F. We found that the pre-rRNA level increased  
190 significantly in the RU486 induction (RU+) group compared with vehicle control (RU-)  
191 group for *nSyb-GS>polr1F RNAi* flies (**Figure 5A**), indicating Polr1F knockdown results  
192 in higher levels of pre-rRNA, which is consistent with studies of Polr1F homologs in  
193 yeast cells (Thuriaux et al., 1995; Rothblum et al., 2014).

194 The increasing ribosomal RNA should help translation and so we also used  
195 incorporation of puromycin into newly synthesized peptides as a measure of translation  
196 after inducing pan-neuronal knockdown of Polr1F. We observed high levels of  
197 translation when Polr1F was knockdown pan-neuronally (RU+) compared to the control  
198 (RU-) group (**Figure 5B**), indicating that Polr1F suppresses translation, probably by  
199 suppressing ribosomal RNA transcription (Rothblum et al., 2014). Thus, it may need to  
200 be downregulated after training to support translation and memory. Given that  
201 knockdown of Polr1F enhances rRNA synthesis and sleep, there is a question as to  
202 whether global alterations in rRNA synthesis impact sleep. However, feeding of rRNA  
203 inhibitor (CX5461) failed to produce rapid sleep phenotypes in both fed and starved flies  
204 (**Figure 5 – supplemental figure 1**), suggesting that rRNA synthesis may not directly  
205 influence sleep. Using puromycin to address effects of Regnase-1 on translation  
206 revealed an insignificant slight increase in translation (data not shown); given that  
207 Regnase-1 may specifically affect pre-existing translationally active mRNA or may act  
208 only on specific target mRNAs, its effects on de novo translation may not be obvious.

## 209 **Discussion**

210           The anterior-posterior (ap)  $\alpha'/\beta'$  neurons of the mushroom body make critical and  
211 privileged contributions to sleep-dependent memory consolidation and post-training  
212 sleep (Krashes et al., 2007; Chouhan et al., 2021), but the mechanisms that link  
213 memory and sleep in these neurons are not known. To address this gap, we conducted  
214 transcriptomic analysis of ap  $\alpha'/\beta'$  neurons from trained and fed flies to identify genes  
215 that change rapidly under conditions that drive sleep-dependent memory. By uncovering  
216 two RNA processing genes involved in memory and sleep, our transcriptome profiling of  
217 ap  $\alpha'/\beta'$  neurons suggests that genes regulating rRNA transcription and translation are  
218 altered in the context of sleep-dependent memory consolidation.

219

### 220 **RNA processing genes mediate sleep-dependent memory consolidation and** 221 **sleep.**

222           Many of the 59 DEGs we identified are implicated in RNA processing. Among  
223 them, Polr1F and CG11920 affect ribosomal RNA processing, CG5654 is predicted to  
224 be part of the 90S pre-ribosome and involved in endonucleolytic cleavages (Herold et al.,  
225 2009), WDR79 encodes a small Cajal body specific RNA binding protein, Nup133  
226 encodes a component of nuclear pore complex, Regnase-1 degrades mRNA, and  
227 CG18011, CG17568, Koko, CG11398 and Meics are all involved in RNA polymerase II-  
228 specific transcription (Di Giorgio et al., 2017; Rogg et al., 2022). The enrichment of RNA  
229 processing and translation genes is consistent with the notion that memory  
230 consolidation requires transcription and translation (Seibt and Frank, 2012; Alberini and

231 Kandel, 2015). More importantly, our findings here indicate that alterations of some of  
232 RNA processing genes may impact sleep as well.

233

234 **Polr1F regulates ribosome RNA synthesis and memory.**

235 Learning-induced changes in gene expression in memory-related neurons are  
236 often critical for long-term memory formation (Cavallaro et al., 2002; Hoedjes et al.,  
237 2015; Tadi et al., 2015). Our findings with Polr1F implicate changes in Pol I transcription  
238 during sleep-dependent memory. Polr1F(Rpa43) is predicted to be part of the RNA  
239 polymerase I complex and is involved in DNA-dependent RNA polymerase  
240 activity/rDNA transcription in yeast, especially for the initiation of ribosomal RNA  
241 (Beckouët et al., 2011; Marygold et al., 2020). As suggested by our data, Polr1F has an  
242 inhibitory role in the RNA polymerase I complex, which is also consistent with  
243 aforementioned study that found a 22 amino acid peptide within Polr1F can inhibit rDNA  
244 transcription (Rothblum et al., 2014). Based upon our finding that inducible knockdown  
245 of Polr1F rapidly promotes translation, it is likely that the rapid and dramatic decline of  
246 Polr1F after training in fed flies serves to increase *de novo* ribosome RNA synthesis.  
247 This is consistent with the report that ribosomal RNA is induced by learning and  
248 required for memory consolidation in mice (Allen et al., 2018). While we do not know  
249 how knockdown of Polr1F promotes sleep, an attractive possibility is that higher  
250 translation is a result of elevated sleep. Sleep is thought to promote translation and it is  
251 required for sleep-dependent memory consolidation (Seibt and Frank, 2012; Chouhan  
252 et al., 2021). Alternatively, increased translation or rRNA synthesis could promote sleep.  
253 However, translation is typically thought of as a consequence of sleep rather than a

254 cause (Zimmerman et al., 2006). Also, rRNA transcription rates remain constant  
255 throughout the day in the liver (Sinturel et al., 2017), although it is still possible that  
256 these rates vary in particular regions of the brain and affect sleep. The role of rRNA  
257 synthesis in *Drosophila* learning and memory has barely been explored, but our work,  
258 together with that of Allen et al. (2018), indicates that the well-known requirement for *de*  
259 *novo* protein synthesis during long-term memory consolidation (Jarome and Helmstetter,  
260 2014) includes increased synthesis of ribosomal RNA and protein.

261

### 262 **Rapid Regnase-1 inactivation may affect memory through effects on translation**

263 The role of RNA binding protein Regnase-1 in the innate immune response has  
264 been extensively studied (Mino et al., 2015; Mao et al., 2017; Wei et al., 2019).  
265 However, our study sheds light on a novel function of neuronal Regase-1 in ap  $\alpha'/\beta'$   
266 neurons on sleep and memory. Regnase-1 is an anti-inflammatory enzyme that inhibits  
267 mRNA translation during acute inflammatory responses. It localizes to the ribosomes on  
268 the surface of the endoplasmic reticulum (ER) and binds to translationally active  
269 mRNAs with specialized stem-loop structures at the 3'UTR (Uehata et al., 2013; Mino et  
270 al., 2015). When phosphorylated, Regnase-1 is released from the ER (Tanaka et al.,  
271 2019). Because functional Regnase-1 binds and degrades its bound mRNA, Regnase-1  
272 inactivation leads to an increase of its target mRNA (Uehata et al., 2013). The target  
273 mRNAs of Regnase-1 in immune cells encode proinflammatory cytokines, which can  
274 then be expressed when Regnase-1 is inactivated. However, Regnase-1 has also been  
275 reported to modulate cytokines and neuronal injury in the microglia in rats (Liu et al.,  
276 2016). Regulation of Regnase-1 is usually rapid and transient, and its rapid response to

277 microenvironmental changes, different pathological states and stress are critical for  
278 cellular adaption (Mao et al., 2017).

279 Our study reveals that the expression of Regnase-1 changes after training, and  
280 constitutive downregulation of Regnase-1 in ap  $\alpha'/\beta'$  neurons reduces sleep and causes  
281 deficits in learning and memory consolidation. We suggest that downregulation of  
282 Regnase-1 following training in fed flies may be crucial for the promotion of long-term  
283 memory, perhaps by promoting translation of specific transcripts. For instance,  
284 downregulation of Regnase-1 after training may release a pool of mRNAs that are  
285 normally targeted by it for decay and that are important for consolidation of memory. On  
286 the other hand, we find that constitutive loss of Regnase-1 impairs sleep-independent  
287 memory and also short-term memory, suggesting that it is required early in the learning  
288 and memory process, likely for learning. Interestingly, constitutive knockdown of  
289 Regnase-1 also reduces sleep and prevents sleep increase after training. The  
290 requirement for sleep is linked most to long-term memory rather than to learning, but  
291 increases in neural activity after training and cognitive tasks are thought to increase the  
292 need to sleep (Wagner et al., 2007; Diekelmann and Born, 2010), so it is possible that  
293 the reduced sleep phenotype of the constitutive Regnase-1 knockdown is related to its  
294 role in learning.

295 Our study of local molecular changes in ap  $\alpha'/\beta'$  neurons after training highlights  
296 how ribosomal RNA transcription and mRNA translation work in concert during the  
297 consolidation of sleep-dependent memory. Neurons are regulated to generate short  
298 bursts of boosted transcription and boosted translation, which are required for new  
299 protein synthesis. How sleep is involved in this boosted protein synthesis process is

300 unclear, but we suggest that sleep affects several steps of the central dogma, and that  
301 deleterious consequences of sleep deprivation are also mediated through effects on  
302 rRNA transcription and translation. Overall, our findings indicate the importance of  
303 maintaining RNA homeostasis for sleep and memory.

304 **Reference:**

- 305 Alberini CM, Kandel ER (2015) The Regulation of Transcription in Memory  
306 Consolidation. *Cold Spring Harbor Perspectives in Biology* 7.
- 307 Allen KD, Regier MJ, Hsieh C, Tsokas P, Barnard M, Phatarpekar S, Wolk J, Sacktor  
308 TC, Fenton AA, Hernández AI (2018) Learning-induced ribosomal RNA is  
309 required for memory consolidation in mice—Evidence of differentially expressed  
310 rRNA variants in learning and memory. *PLOS ONE* 13:e0203374.
- 311 Beckouët F, Mariotte-Labarre S, Peyroche G, Nogi Y, Thuriaux P (2011) Rpa43 and its  
312 partners in the yeast RNA polymerase I transcription complex. *FEBS Letters*  
313 585:3355–3359.
- 314 Cavallaro S, D'Agata V, Manickam P, Dufour F, Alkon DL (2002) Memory-specific  
315 temporal profiles of gene expression in the hippocampus. *Proceedings of the*  
316 *National Academy of Sciences* 99:16279–16284.
- 317 Chouhan NS, Griffith LC, Haynes P, Sehgal A (2021) Availability of food determines the  
318 need for sleep in memory consolidation. *Nature* 589:582–585.
- 319 Dag U, Lei Z, Le JQ, Wong A, Bushey D, Keleman K (2019) Neuronal reactivation  
320 during post- learning sleep consolidates long-term memory in drosophila. *eLife* 8.
- 321 Di Giorgio ML, Esposito A, Maccallini P, Micheli E, Bavasso F, Gallotta I, Verni F,  
322 Feiguin F, Cacchione S, McCabe BD, Di Schiavi E, Raffa GD (2017)  
323 WDR79/TCAB1 plays a conserved role in the control of locomotion and  
324 ameliorates phenotypic defects in SMA models. *Neurobiol Dis* 105:42–50.
- 325 Diekelmann S, Born J (2010) The memory function of sleep. *Nat Rev Neurosci* 11:114–  
326 126.
- 327 Herold N, Will CL, Wolf E, Kastner B, Urlaub H, Lührmann R (2009) Conservation of the  
328 Protein Composition and Electron Microscopy Structure of *Drosophila*  
329 *melanogaster* and Human Spliceosomal Complexes. *Mol Cell Biol* 29:281–301.
- 330 Hoedjes KM, Smid HM, Schijlen EG, Vet LE, van Vugt JJ (2015) Learning-induced gene  
331 expression in the heads of two *Nasonia* species that differ in long-term memory  
332 formation. *BMC Genomics* 16:162.
- 333 Jarome TJ, Helmstetter FJ (2014) Protein degradation and protein synthesis in long-  
334 term memory formation. *Frontiers in Molecular Neuroscience* 7 Available at:  
335 <https://www.frontiersin.org/articles/10.3389/fnmol.2014.00061> [Accessed  
336 September 28, 2022].
- 337 Krashes MJ, Keene AC, Leung B, Armstrong JD, Waddell S (2007) Sequential use of  
338 mushroom body neuron subsets during *drosophila* odor memory processing.  
339 *Neuron* 53:103–115.



- 340 Krashes MJ, Waddell S (2008) Rapid Consolidation to a radish and Protein Synthesis-  
341 Dependent Long-Term Memory after Single-Session Appetitive Olfactory  
342 Conditioning in *Drosophila*. *J Neurosci* 28:3103–3113.
- 343 Li H, Horns F, Wu B, Xie Q, Li J, Li T, Luginbuhl DJ, Quake SR, Luo L (2017)  
344 Classifying *Drosophila* Olfactory Projection Neuron Subtypes by Single-Cell RNA  
345 Sequencing. *Cell* 171:1206-1220.e22.
- 346 Liu X-X, Wang C, Huang S-F, Chen Q, Hu Y-F, Zhou L, Gu Y (2016) Regnase-1 in  
347 microglia negatively regulates high mobility group box 1-mediated inflammation  
348 and neuronal injury. *Sci Rep* 6:24073.
- 349 Mao R, Yang R, Chen X, Harhaj EW, Wang X, Fan Y (2017) Regnase-1, a rapid  
350 response ribonuclease regulating inflammation and stress responses. *Cell Mol*  
351 *Immunol* 14:412–422.
- 352 Marygold SJ, Alic N, Gilmour DS, Grewal SS (n.d.) In silico identification of *Drosophila*  
353 *melanogaster* genes encoding RNA polymerase subunits. *MicroPubl Biol*  
354 2020:10.17912/micropub.biology.000320.
- 355 Mino T, Murakawa Y, Fukao A, Vandebon A, Wessels H-H, Ori D, Uehata T, Tartey S,  
356 Akira S, Suzuki Y, Vinuesa CG, Ohler U, Standley DM, Landthaler M, Fujiwara T,  
357 Takeuchi O (2015) Regnase-1 and Roquin Regulate a Common Element in  
358 Inflammatory mRNAs by Spatiotemporally Distinct Mechanisms. *Cell* 161:1058–  
359 1073.
- 360 Rasch B, Born J (2013) About Sleep's Role in Memory. *Physiological Reviews* 93:681.
- 361 Robles-Murguía M, Hunt LC, Finkelstein D, Fan Y, Demontis F (2019) Tissue-specific  
362 alteration of gene expression and function by RU486 and the GeneSwitch  
363 system. *npj Aging Mech Dis* 5:1–5.
- 364 Rogg M, Maier JI, Ehle M, Sammarco A, Schilling O, Werner M, Schell C (2022)  
365 NUP133 Controls Nuclear Pore Assembly, Transcriptome Composition, and  
366 Cytoskeleton Regulation in Podocytes. *Cells* 11:1259.
- 367 Roselli C, Ramaswami M, Boto T, Cervantes-Sandoval I (2021) The Making of Long-  
368 Lasting Memories: A Fruit Fly Perspective. *Frontiers in Behavioral Neuroscience*  
369 15.
- 370 Rothblum K, Hu Q, Penrod Y, Rothblum LI (2014) Selective Inhibition of rDNA  
371 Transcription by a Small-Molecule Peptide That Targets the Interface between  
372 RNA Polymerase I and Rrn3. *Molecular Cancer Research* 12:1586–1596.
- 373 Seibt J, Frank MG (2012) Translation regulation in sleep. *Commun Integr Biol* 5:491–  
374 495.

- 375 Sinturel F, Gerber A, Mauvoisin D, Wang J, Gatfield D, Stubblefield JJ, Green CB,  
376 Gachon F, Schibler U (2017) Diurnal Oscillations in Liver Mass and Cell Size  
377 Accompany Ribosome Assembly Cycles. *Cell* 169:651-663.e14.
- 378 Tadi M, Allaman I, Lengacher S, Grenningloh G, Magistretti PJ (2015) Learning-Induced  
379 Gene Expression in the Hippocampus Reveals a Role of Neuron -Astrocyte  
380 Metabolic Coupling in Long Term Memory. *PLoS One* 10:e0141568.
- 381 Tanaka H, Arima Y, Kamimura D, Tanaka Y, Takahashi N, Uehata T, Maeda K, Satoh T,  
382 Murakami M, Akira S (2019) Phosphorylation-dependent Regnase-1 release from  
383 endoplasmic reticulum is critical in IL-17 response. *Journal of Experimental*  
384 *Medicine* 216:1431–1449.
- 385 Thuriaux P, Mariotte S, Buhler J-M, Sentenac A, Vu L, Lee B-S, Nomura M (1995) Gene  
386 RPA43 in *Saccharomyces cerevisiae* Encodes an Essential Subunit of RNA  
387 Polymerase I (\*). *Journal of Biological Chemistry* 270:24252–24257.
- 388 Uehata T, Iwasaki H, Vandebon A, Matsushita K, Hernandez-Cuellar E, Kuniyoshi K,  
389 Satoh T, Mino T, Suzuki Y, Standley DM, Tsujimura T, Rakugi H, Isaka Y,  
390 Takeuchi O, Akira S (2013) Malt1-Induced Cleavage of Regnase-1 in CD4+  
391 Helper T Cells Regulates Immune Activation. *Cell* 153:1036–1049.
- 392 Wagner U, Kashyap N, Diekelmann S, Born J (2007) The impact of post-learning sleep  
393 vs. wakefulness on recognition memory for faces with different facial expressions.  
394 *Neurobiology of learning and memory* 87:679–687.
- 395 Wei J, Long L, Zheng W, Dhungana Y, Lim SA, Guy C, Wang Y, Wang Y-D, Qian C, Xu  
396 B, Kc A, Saravia J, Huang H, Yu J, Doench JG, Geiger TL, Chi H (2019)  
397 Targeting REGNASE-1 programs long-lived effector T cells for cancer therapy.  
398 *Nature* 576:471–476.
- 399 Zimmerman JE, Rizzo W, Shockley KR, Raizen DM, Naidoo N, Mackiewicz M, Churchill  
400 GA, Pack AI (2006) Multiple mechanisms limit the duration of wakefulness in  
401 *Drosophila* brain. *Physiological Genomics* 27:337–350.

402

403 **Conflict of interest statement**

404 The authors declare no competing interests.

405 **Acknowledgments**

406 This work was supported by Howard Hughes Medical Institute (HHMI). We thank all  
407 members of the Sehgal lab for reagents, comments and support, especially rotation  
408 undergraduate Arielle Ketchum for help with molecular cloning. We thank Hongjie Li of  
409 Liqun Luo lab with technical assistance and protocol sharing from Stanford University.

410 **Author contributions**

411 Conceptualization, Y.J.L., N.S.C. and A.S.; Methodology, Y.J.L., N.S.C., S.Z. and R.M.  
412 Software, Y.J.L.; Validation, Y.J.L., N.S.C., S.Z., R.M., J.S., A.K. and Z.F.Y.; Formal  
413 analysis, Y.J.L., N.S.C. and R.M.; Investigation, Y.J.L. and N.S.C.; Resources, Y.J.L.,  
414 N.S.C., S.Z., R.M., J.S., A.K. and Z.F.Y.; Data Curation, Y.J.L., N.S.C. and R.M.;  
415 Writing – Original Draft, Y.J.L. and N.S.C. Writing – Review & Editing, Y.J.L., N.S.C.  
416 and A.S. Visualization, Y.J.L., N.S.C. and R.M.; Supervision, Y.J.L., N.S.C. and A.S.;  
417 Project administration, A.S.; Funding acquisition, A.S.

418

419 **Figures**

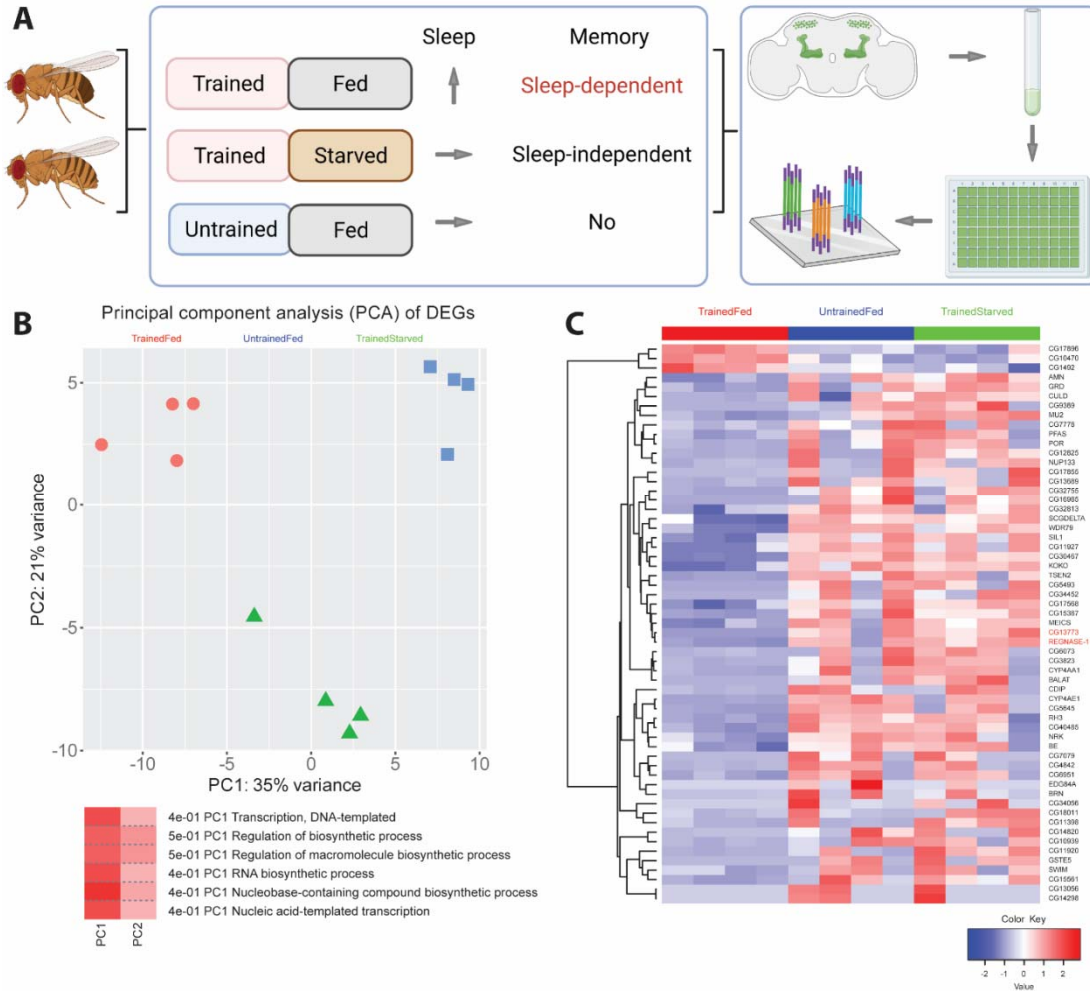

420  
421

422 **Figure1. Differential gene expression after training in mushroom ap  $\alpha/\beta$  neurons.**  
 423 (A) 5-7 day old mixed sex *wCS* flies were exposed to one of the following three  
 424 conditions: Trained-Fed, Trained-Starved and Untrained-Fed. Only Trained-Fed flies are  
 425 expected to increase sleep after treatment and thus form sleep-dependent memory  
 426 (Chouhan et al., 2021). Brain dissection, single cell suspension and cell sorting were  
 427 used to extract ap  $\alpha/\beta$  neurons in each of these three different conditions, and bulk-  
 428 sequencing of the sorted cells was conducted. (B) We sequenced four samples for each  
 429 condition and principal component analysis (PCA) analysis of the differentially  
 430 expressed genes (DEGs) between the three different conditions showed that the  
 431 samples were separatable from each other and genes responsible for PC1, which  
 432 accounted for 35% of variance, largely encode proteins involved in transcription and  
 433 biosynthesis, including RNA biosynthesis, processes. (C) Heatmap of the 59 DEGs  
 434 including two genes, CG13773 (Polr1F) and Regnase-1, which affect sleep and are the  
 435 focus of this study. DEGs are identified by DESeq2 with the cutoff of FDR < 0.1 and fold  
 436 change > 1.5.

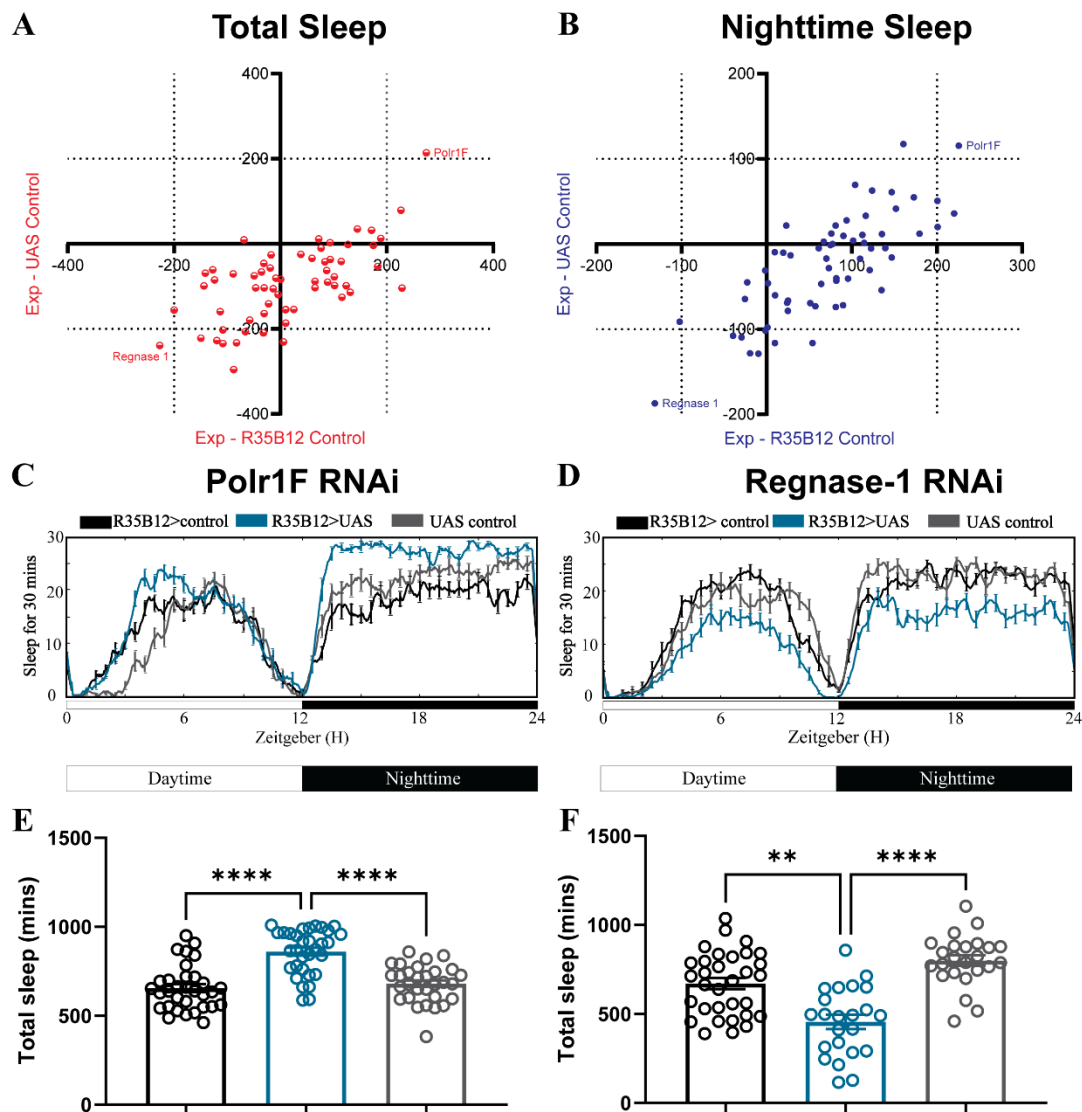

437  
438

**Figure 2. The sleep screen of differentially expressed genes identifies Polr1F and Regnase-1 as sleep-regulating genes.** (A-B) Flies carrying the ap  $\alpha'/\beta'$  neuron driver R35B12-Gal4 were crossed with flies carrying UAS-RNAi constructs targeting DEGs identified from RNA-seq analysis. 5-7 days old female F1 progeny were loaded onto Trikinetics DAM monitors to measure their sleep in a 12-hour light: 12-hour dark (12:12 LD) cycle. Mean total sleep (A) and nighttime sleep (B) were calculated by Pysolo and the difference between experimental flies and Gal4 and RNAi controls was calculated separately for each independent experiment; average values comparing each experimental to its Gal4 control (X-axis) and RNAi control (Y-axis) are shown in the plots. Of all the lines screened, knockdown of Polr1F and Regnase-1 had strongest effects on sleep, producing an increase and decrease in sleep respectively. (C-F) show the representative sleep traces of *R35B12-Gal4>polr1F RNAi* flies and *R35B12-Gal4>regnase1 RNAi*. N = 23-32 per genotype from two independent replicates combined are shown in E and F respectively, and bar graphs show mean + SEM. p

453 values for each comparison were calculated using the Kruskal-Wallis test with Dunn's  
454 multiple comparisons test. \*\* $p < 0.01$ , \*\*\* $p < 0.001$ , \*\*\*\* $p < 0.0001$ .

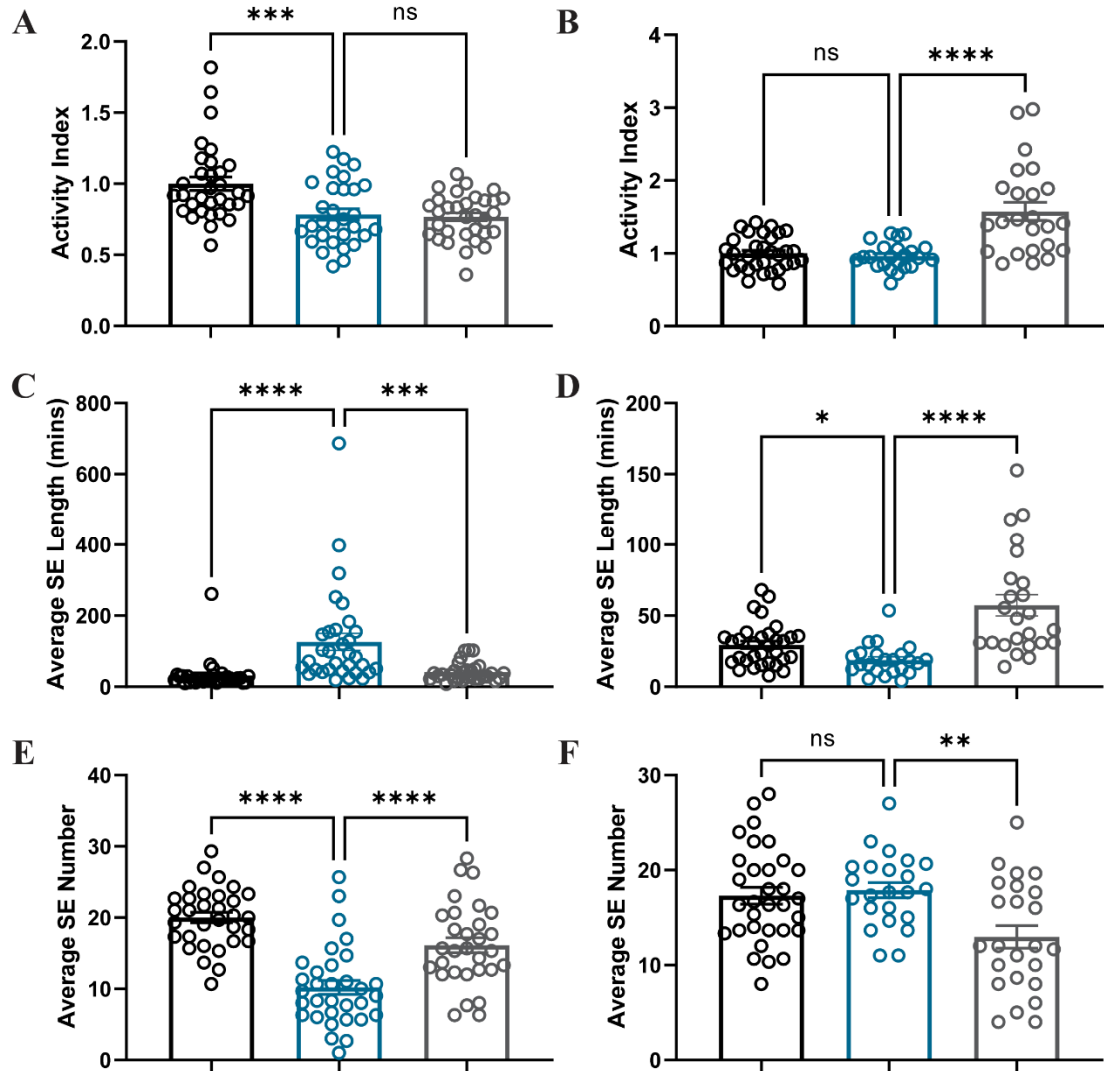

455  
456

457 **Figure 2 – supplemental figure 1. Effect of Polr1F and Regnase-1 knockdown on**  
458 **activity and sleep architecture.** (A-B) Total activity of flies is not altered by knockdown  
459 of Polr1F and Regnase-1. One-way ANOVA was used to calculate the p-values for each  
460 comparison. (C-D) Knockdown of Polr1F significantly increases the nighttime average  
461 sleep episode (SE) length in *R35B12-Gal4>polr1F RNAi* flies, while knockdown of  
462 Regnase-1 reduces it in *R35B12-Gal4>regnase1 RNAi* flies. The p-values for each  
463 comparison were calculated using the Kruskal–Wallis test with Dunn’s multiple  
464 comparisons test. (E-F) Knockdown of Polr1F significantly reduces the nighttime  
465 average sleep episode (SE) number in *R35B12-Gal4>polr1F RNAi* flies, but it is not  
466 significant compared to control groups in *R35B12-Gal4>regnase1 RNAi* flies. The  
467 p-values for each comparison were calculated using the Kruskal–Wallis test with Dunn’s  
468 multiple comparisons test. ns = not significant,  $p > 0.05$ , \* $p < 0.05$ , \*\* $p < 0.01$ , \*\*\* $p <$   
469  $0.001$ , \*\*\*\* $p < 0.0001$ .

## *nSyb-GS>polr1f RNAi*

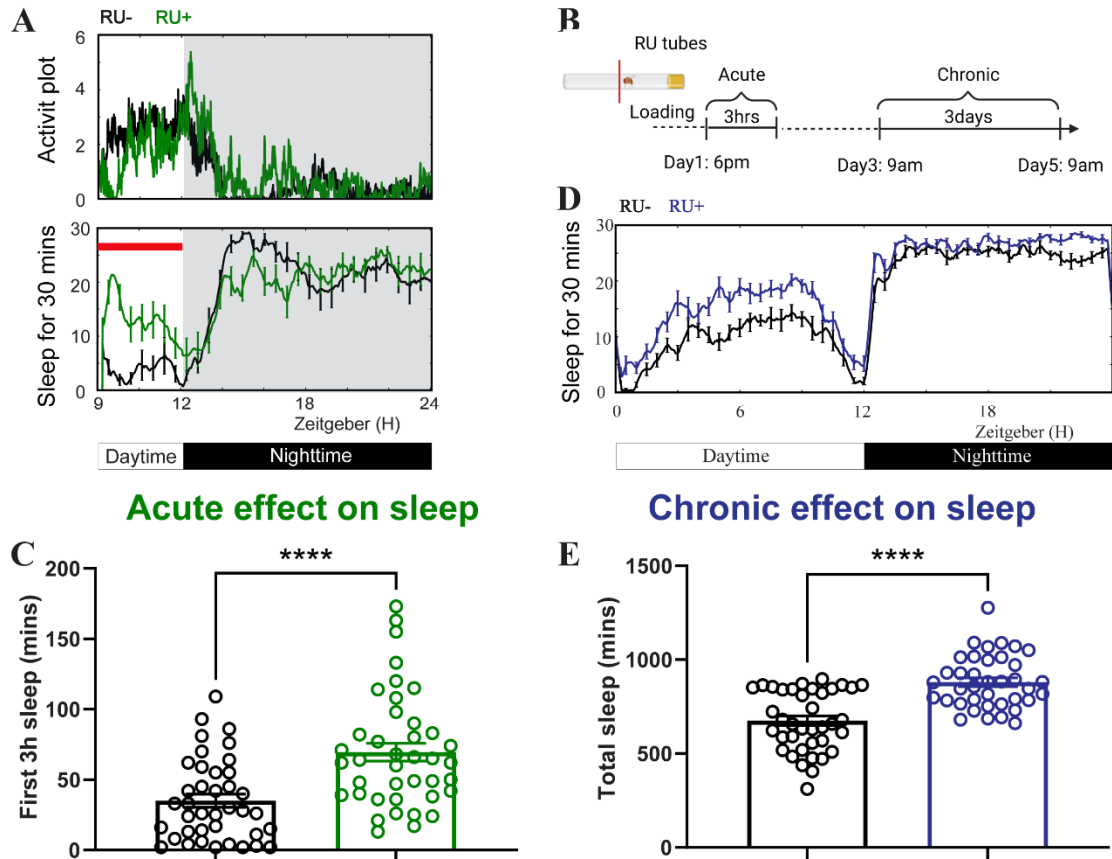

470  
471

472 **Figure 3. Acute and chronic effects of pan-neuronal knockdown of Polr1F on**  
 473 **sleep in adult flies.** (A) Representative sleep traces and transient activity plot of flies  
 474 expressing Polr1F RNAi under the control of an inducible pan-neuronal driver (*nSyb-*  
 475 *GS>polr1f RNAi*) with and without RU treatment. (B) Schematic representation of  
 476 transient and chronic sleep measurements in *nSyb-GS>polr1f RNAi* flies. (C)  
 477 Quantification of sleep during the first 3 hours (ZT 9-12) after F1 progeny flies were  
 478 loaded into RU- or RU+ DAM tubes at ZT8-T9. Sleep was measured starting at ZT9. N  
 479 = 39-40 individual flies per replicate with data from three independent replicates  
 480 combined. The Mann-Whitney test was used to compare RU+ group and RU- groups.  
 481 (D) Representative average sleep traces of *nSyb-GS>polr1f RNAi* in the RU- and RU+  
 482 DAM tubes for three consecutive days. Chronic sleep effects of pan-neuronal  
 483 knockdown Polr1F were measured based on sleep data from day 3 to day 5. (E)  
 484 Quantification of average total sleep of *nSyb-GS>polr1f RNAi* and controls in the DAM  
 485 tubes from (D). Unpaired t-test was used to compare between RU- and RU+ groups.  
 486 \*\*\*\*p<0.0001.



## *nSyb-GS>regnase-1 RNAi*

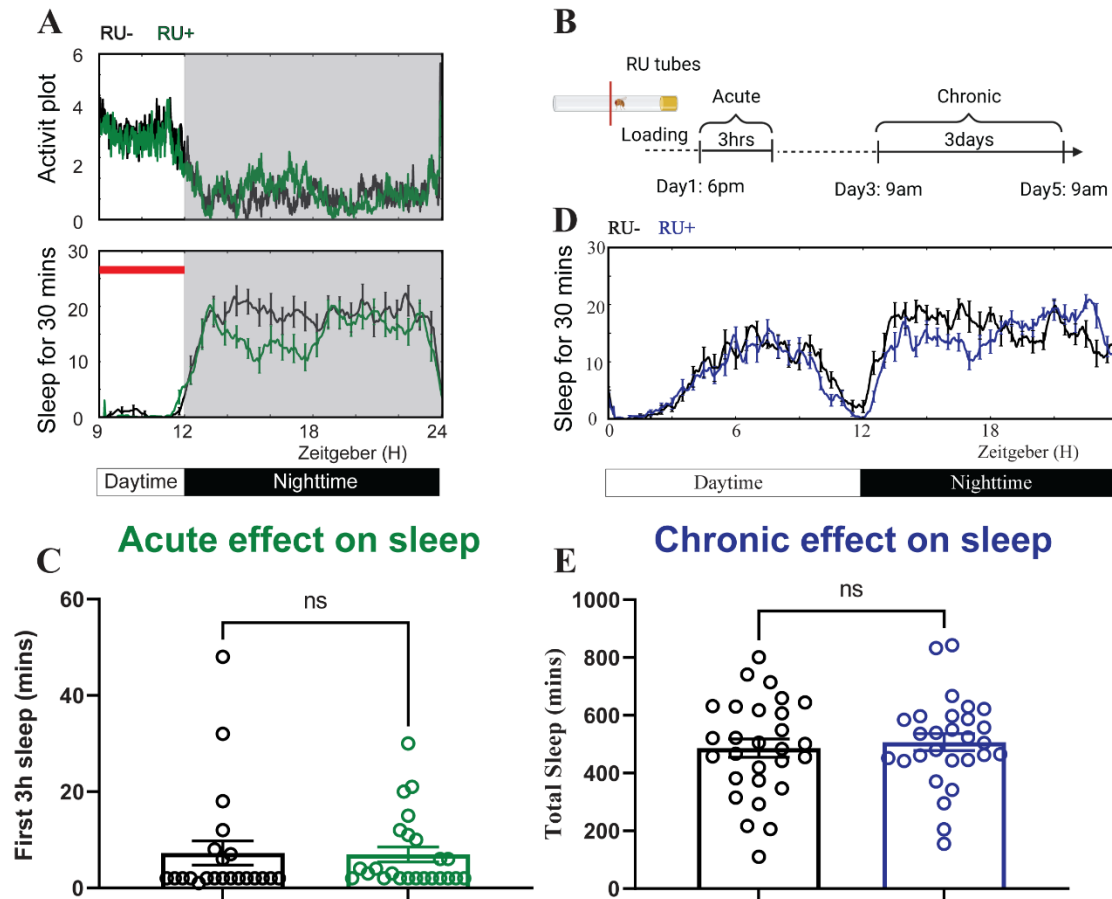

487  
488

489 **Figure 3 – supplemental figure 1. Acute and chronic effects of pan-neuronal**  
 490 **knockdown of Regnase-1 on sleep in adult flies.** (A) Representative sleep traces  
 491 and transient activity plot of flies expressing Rengase-1 RNAi under the control of an  
 492 inducible pan-neuronal driver (*nSyb-GS>regnase-1 RNAi*) with and without RU  
 493 treatment. (B) Schematic representation of transient and chronic sleep measurements  
 494 in *nSyb-GS>regnase-1 RNAi* flies. (C) Quantification of sleep during the first 3 hours  
 495 (ZT 9-12) after F1 progeny flies were loaded into RU- or RU+ DAM tubes at ZT8-T9.  
 496 Sleep was measured starting at ZT9. N = 22-24 individual flies per replicate with data  
 497 from two independent replicates combined. The Mann-Whitney test was used to  
 498 compare RU+ group and RU- groups. (D) Representative average sleep traces of *nSyb-*  
 499 *GS>regnase-1 RNAi* in the RU- and RU+ DAM tubes for three consecutive days.  
 500 Chronic sleep effects of knockdown of Regnase-1 were measured based on sleep data  
 501 from day 3 to day 5. (E) Quantification of average total sleep of *nSyb-GS>regnase-1*  
 502 *RNAi* and controls in the DAM tubes from (D). Unpaired t-test was used to compare  
 503 between RU- and RU+ group. ns = not significant.

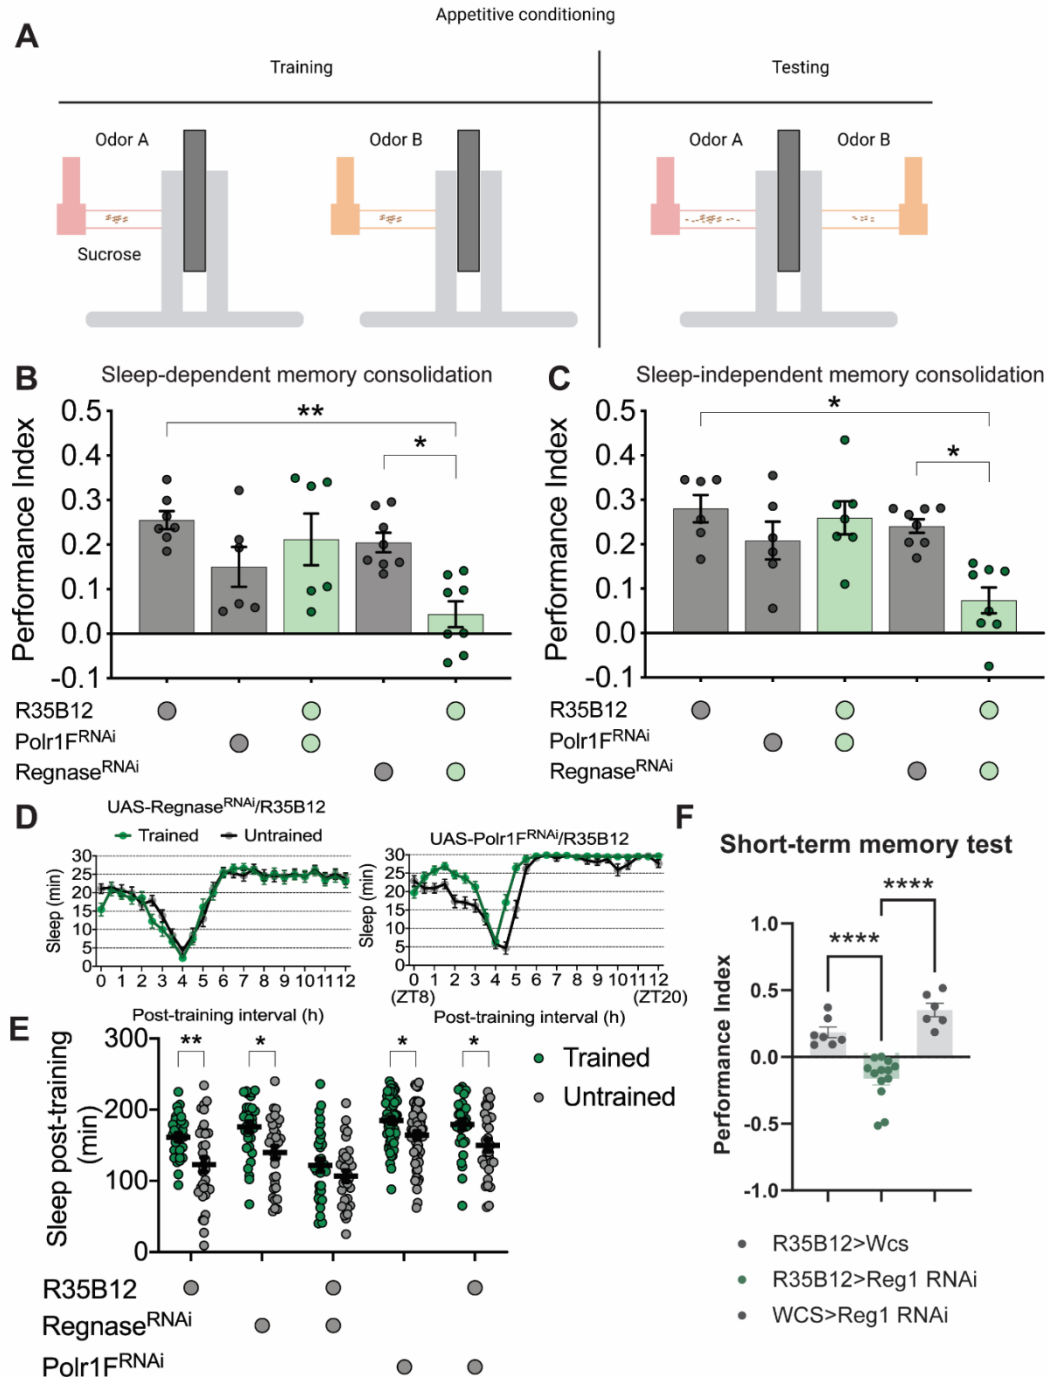

**Figure 4. Regnase-1 expression is essential for sleep-dependent and sleep-independent memory.** (A) Schematic representation of the memory test protocol. (B, C) Sleep-dependent and sleep-independent memory tests were conducted under fed and starved conditions, respectively. Knockdown of Regnase-1 significantly reduces long-term memory performance in both fed and starved flies. However, knockdown of Polr1F in ap  $\alpha/\beta'$  neurons does not affect long-term memory performance.  $N \geq 6$  biological replicates, each replicate containing 100-150 flies. (D, E) Fed UAS-regnase-1-RNAi/+ and R35B12/+ flies exhibit a significant increase in sleep after training, while R35B12-

514 *Gal4>regnase-1 RNAi* flies fail to show a comparable increase in post-training sleep.  
515 The total sleep in the ZT8-ZT12 interval is shown in (E). Polr1F knockdown in ap  $\alpha'/\beta'$   
516 neurons does not affect the post-training increase in sleep. N $\geq$ 32. (F) Compared to  
517 R35B12-Gal4/+ and +/UAS-Regnase-1 RNAi flies, *R35B12-Gal4>regnase-1 RNAi* flies  
518 show a significant decrease in the performance index in short-term memory. N $\geq$ 6  
519 biological replicates, each containing 100-150 flies. ns=not significant, p>0.05, \*p<0.05,  
520 \*\*p<0.01, \*\*\*\*p<0.0001.

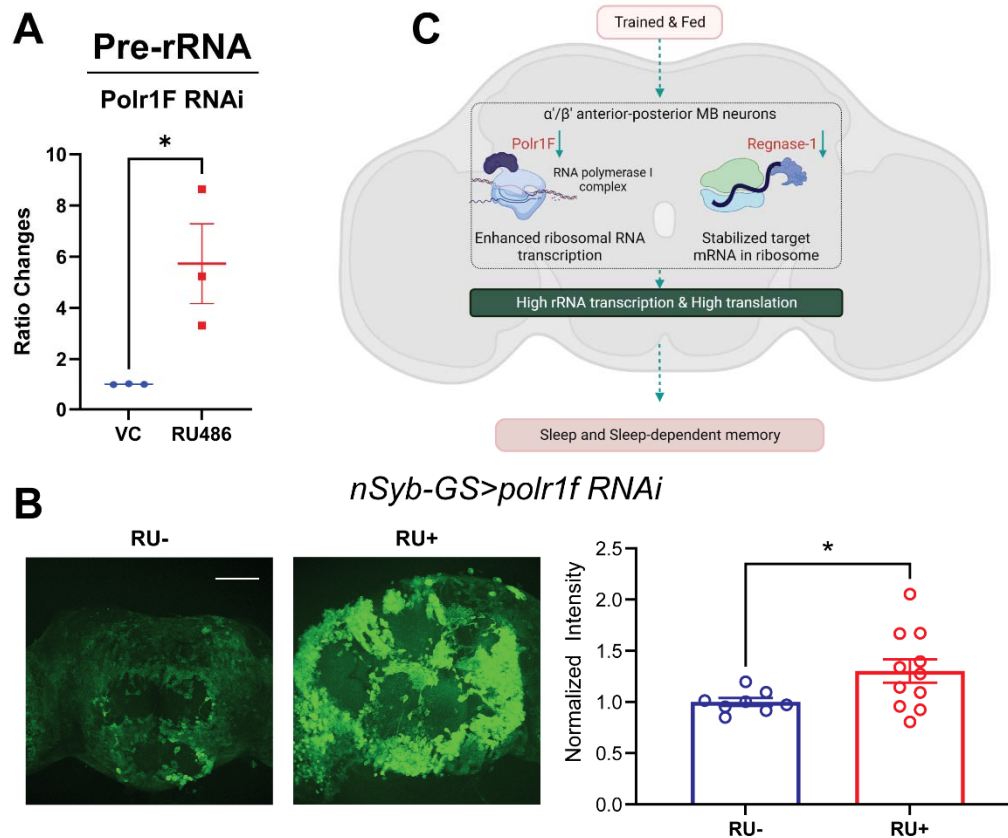

521  
522

523 **Figure 5. Knockdown of Polr1F results in high translation.** (A) The *nSyb-GS>polr1f*  
524 *RNAi* flies exhibit a significant increase in pre-rRNA levels. (B) The ex-vivo puromycin  
525 immunostaining assay was used to measure translation in dissected whole brains. The  
526 results show that knockdown of Polr1F using the pan-neuronal *nSyb-GeneSwitch* (GS)  
527 system increases translation relative to control flies that were not treated with RU. The  
528 normalized mean grayscales from the RU- and RU+ groups are compared using an  
529 unpaired t-test. The analysis includes data from 8-11 flies per group, with results from  
530 two independent replicates combined. (C) The schematic model illustrates the roles of  
531 Polr1F and Regnase-1 in memory consolidation. The genes Polr1F and Regnase-1 are  
532 prominently downregulated during memory consolidation in trained and fed flies,  
533 respectively. Polr1F is involved in regulating ribosomal RNA synthesis, and its decrease  
534 in levels in trained and fed flies promotes sleep and translation. In contrast, Regnase-1  
535 is involved in mRNA decay, and its downregulation during memory consolidation may  
536 contribute to the stabilization of mRNAs that encode proteins important for long-term  
537 memory formation.

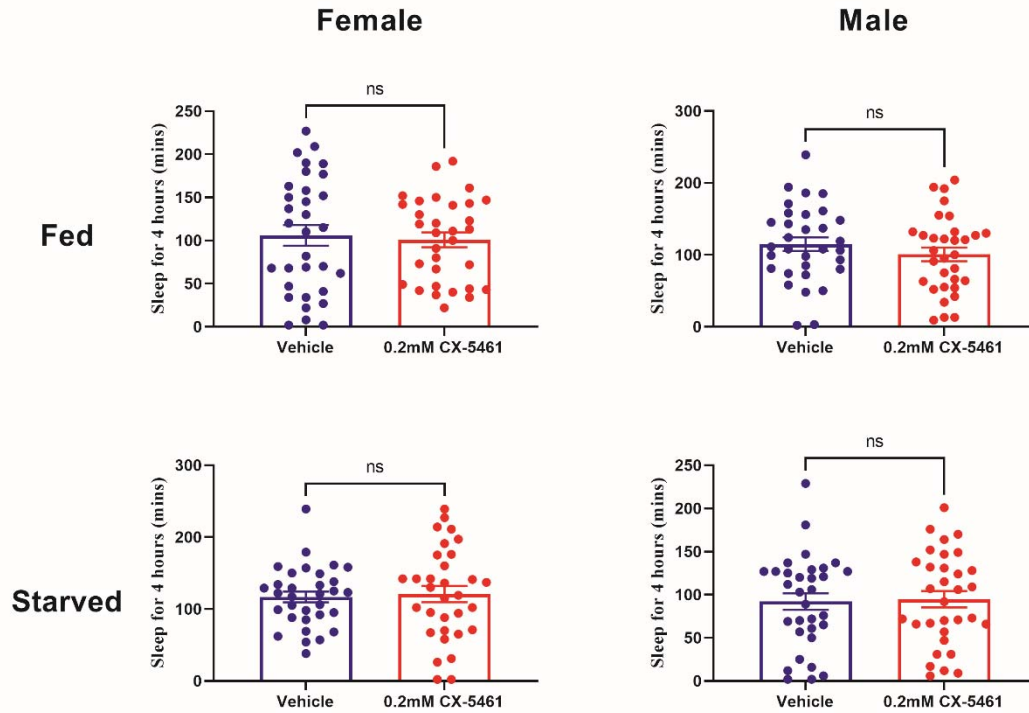

538  
539  
540  
541  
542  
543  
544

**Figure 5 – supplemental figure 1. rRNA inhibitor (CX-5461) feeding does not affect sleep.** Feeding of the ribosome RNA inhibitor CX-5461 at a concentration of 0.2mM does not affect sleep in fed or starved flies. Statistical analysis shows that there is no significant difference between CX-5461-fed and control flies. The sample size is N=32 per group from two independent replicates. ns, not significant).

545 **Materials and Methods**

546 **Contact for reagent and resource sharing.**

547 Amita Sehgal (amita@penncmedicine.upenn.edu)

548

549 **Key resource table**

| REAGENT or RESOURCE                                  | SOURCE            | IDENTIFIER     |
|------------------------------------------------------|-------------------|----------------|
| Schneider's medium                                   | Thermofisher      | 21720024       |
| Papain                                               | Worthington PAP2  | LK003178       |
| Liberase                                             | Roche             | 5401119001     |
| DAPI                                                 | Thermofisher      | 62247          |
| <b>Antibodies</b>                                    |                   |                |
| Anti-Puromycin [3RH11] Antibody                      | Kerafast          | EQ0001         |
| <b>Chemicals, Peptides, and Recombinant Proteins</b> |                   |                |
| Puromycin dihydrochloride                            | Santa Cruz        | Sc-108071A     |
| RNA Polymerase I Inhibitor II, CX-5461               | Sigma             | 5092650001     |
| <b>Critical Commercial Assays</b>                    |                   |                |
| RNeasy Plus Mini Kit                                 | Qiagen            | Item No. 74134 |
| <b>Experimental Models; Organisms/Strains</b>        |                   |                |
| white Canton-S (wCS)                                 | Laboratory Stocks |                |
| <i>nSyb-GS<sup>4</sup></i>                           | Laboratory Stocks |                |
| <i>R35B12-Gal4</i>                                   | BDSC              | 49822          |
| <i>UAS-nGFP</i>                                      | BDSC              | 4775           |
| <i>R26E01-Gal4</i>                                   | BDSC              | 60510          |
| <b>Oligonucleotides</b>                              |                   |                |
| Pre-rRNA oligo:                                      |                   | N/A            |
| F: ATG GCC GTA TTC GAA TGG ATT TA                    | This paper        | N/A            |
| R: CTA CTG GCA GGA TCA ACC AGA                       | This paper        | N/A            |
| Polr1F oligos:                                       |                   | N/A            |
| F: TGC TAG AGA ATG GCG AAG C                         |                   | N/A            |

|                                   |                               |                                                                           |
|-----------------------------------|-------------------------------|---------------------------------------------------------------------------|
| R: GGA CTG CCA AAC TTA ATG GAT TT |                               | N/A                                                                       |
| Tubulin oligo                     |                               | N/A                                                                       |
| F: CGT CTG GAC CAC AAG TTC GA     | (Xu et al., 2008)             | N/A                                                                       |
| R: CCT CCA TAC CCT CAC CAA CGT    | (Xu et al., 2008)             | N/A                                                                       |
| <b>Software and Algorithms</b>    |                               |                                                                           |
| GraphPad Prism v9                 | GraphPad Software             | <a href="https://www.graphpad.com/">https://www.graphpad.com/</a>         |
| DAMFileScan113                    | Trikinetics                   | <a href="https://trikinetics.com/">https://trikinetics.com/</a>           |
| Pysolo                            | Giorgio Gilestro et al., 2009 | <a href="https://www.pysolo.net/about/">https://www.pysolo.net/about/</a> |
| Adobe Illustrator 2020            | Adobe                         | <a href="https://www.adobe.com/">https://www.adobe.com/</a>               |
| BioRender                         | BioRender                     | <a href="https://biorender.com/">https://biorender.com/</a>               |

550

## 551 **Fly stock and maintenance**

552 All the stock information of the flies used in this project are listed in the key resource  
553 table and flies were reared on the standard cornmeal vials or bottles at 25 °C with 12:12  
554 hours light dark cycle in the preset incubator. The genetic background control used in  
555 the paper is White-CantonS (wCS) unless specified.

556

## 557 **Behavior measurement in *Drosophila***

558 We have used both single beam and updated multibeam *Drosophila* activity monitoring  
559 (DAM) system from Trikinetics (<https://trikinetics.com/>) in our experiments. Briefly, 5-7  
560 days old female flies were loaded into 60/90 mm glass locomotor tubes for behavior  
561 tests, using DAM2/5H *Drosophila* activity monitors from Trikinetics. 1/15 infrared beams  
562 bisect each tube, providing movement (position in multibeam) information of the fly  
563 across the tube. Locomotor tubes are loaded with 2% agar with 5% sucrose as fly food  
564 on one side, and yarn is put on the other side to restrain the behavior of flies inside the  
565 glass tubes. For experiments with the inducible Gene Switch system, 0.5mM RU-486  
566 (mifepristone) was added to the fly food to activate the expression of the transgenes

567 under the control of UAS. Three constitutive days of data were used for sleep analysis  
568 by Pysolo (<https://www.pysolo.net/>).

569

### 570 **Appetitive conditioning**

571 ~100 4-7 old flies were starved for 12 hours in *Drosophila* bottles with water -soaked  
572 filtered paper and then trained at 25°C and 70% relative humidity to associate sucrose  
573 with odor A for 2 minutes, and then a blank with odor B for 2 minutes with 30-second  
574 clean air in between. After conditioning, flies were moved back to normal fly food or  
575 starved for 1 hour and dissected for subsequent ap cell sorting and RNA-sequencing.  
576 For the short-term memory test, flies were tested immediately after conditioning in the  
577 same wheel for 2 mins.

578

579 To assess post-training sleep, flies were introduced in glass tubes containing 2% agar  
580 and 5% sucrose through an aspirator without anesthesia and loaded into the DAM  
581 system after training. For long-term memory assessment, trained flies were either kept  
582 on food vials for 24 h or were further starved. Starved flies were tested for memory 24 h  
583 after training, while fed flies were re-starved for 42 h before memory tests. Memory was  
584 tested by giving flies a choice between odor A and odor B for 2 min in a T-maze.

585 Performance index (PI) was calculated as the number of flies selecting CS<sup>+</sup> odor minus  
586 the number of flies selecting CS<sup>-</sup> odor divided by the total number of flies. Each PI is the  
587 average of PIs from reciprocal experiments with two odors swapped to minimize non-  
588 associative effects.

589



## 590 **Cell isolation and sorting**

591 Dissected brains are dissociated by following the protocol from (Li et al., 2017). Briefly,  
592 brains are dissected in Schneider's medium, and then are placed in a shaker and  
593 dissociated in Papain solution, filtered through a 100  $\mu\text{m}$  cell strainer, and re-suspended  
594 in Schneider's medium. 500 GFP+ cells from the same conditions were sorted into 96  
595 well microplate with lysis buffer from Smart-seq2 HT kit and frozen. We dissected 50  
596 brains for each group to ensure enough GFP+ cells. Cell sorting were conducted by  
597 either BD FACSMelody or BD FACSAria (BD Biosciences), and dead cells were  
598 excluded with 4', 6-diamidino-2-phenylindole (DAPI). Doublets were excluded using and  
599 forward scatter (FSC-H by FSC-W) and side scatter (SSC-H by SSC-W). Size of cells  
600 was selected by FSC-A by FSC-A and validated for fly neurons using cells from flies  
601 expressing nsyb-nGFP. Length of time from tissue harvest to cell collection  
602 approximated 4 hours.

603

## 604 **RNA-seq and data analysis**

605 GFP+ cells were sorted and immediately frozen, then sent to Admera Health  
606 (<https://www.admerahealth.com/>) for RNA extraction, RNA library construction, and  
607 sequencing using the Smart-seq2 HT kit. To analyze the RNA-sequence data, we used  
608 Hisat2 (<http://daehwankimlab.github.io/hisat2/>) to map the sequencing data FASTQ files  
609 to the fly genome (BDSG6). The alignment results were then counted by LiBiNorm  
610 (<https://warwick.ac.uk/fac/sci/lifesci/research/libinorm/>) using the GENCODE reference  
611 genome. Raw count and TPM were used separately in further analysis. Raw count data  
612 were analyzed by IDEP v0.95 to identify genes expressed differentially between three

613 conditions. We filtered out low-expressed genes using a cutoff of CPM>0.5, at least  
614 detected in 3 independent samples, and treated missing values as gene median.  
615 Regularized log transformation was used to transform raw count data for clustering and  
616 PCA. Differentially expressed genes were identified using DESeq2 with an FDR cutoff  
617 of 0.1 and minimum fold change of 2.

618

### 619 **Puromycin assay and imaging**

620 We developed a puromycin assay to measure the rate and localization of nascent  
621 peptide synthesis in the fly brain, and similar method has been described in the fly  
622 larvae (Deliu et al., 2017). Fly brains were dissected in Schneiders' medium and  
623 incubated with puromycin for 40 min *in vitro* to allow puromycin to incorporate into the  
624 newly synthesized peptide. Subsequently, using an anti-puromycin antibody, standard  
625 immunostaining protocols were applied to detect the number and position of newly  
626 synthesized puromycin-tagged peptides (Aviner, 2020), which provided a measure of  
627 translation rate. The brains were then imaged with a 40X oil immersion confocal  
628 microscope with a resolution of 1024\*1024. The intensity of the images was then  
629 measured by FUJI (ImageJ) and the average intensity of the samples was analyzed for  
630 comparison.

631

### 632 **RNA polymerase I inhibitor II, CX-5461 protocol**

633 CX-5461 was mixed with 2% agar and 5% sucrose to make fly motor tubes at a final  
634 concentration of 0.2 mM or 0.6 mM. Flies are loaded into these CX-5461 tubes or

635 vehicle control tubes 4 hours before light turns off and transient sleep changes are  
636 measured.

637

### 638 **Quantitative Real-time PCR (qPCR)**

639 10 flies' brains from each group were dissected for RNA extraction using Qiagen's  
640 RNeasy Plus Mini Kit. Total RNA was then reverse transcribed to cDNA by using  
641 random hexamers and Superscript II from Invitrogen. qPCR was performed using  
642 SYBR-green master mix and oligonucleotide information is provided in the Key  
643 Resources table. Relative gene expression was analyzed using the  $\Delta\Delta C_t$  method.

644

### 645 **Statistical Analysis**

646 Fly sleep behavioral data extracted from Pysolo was analyzed by GraphPad Prism  
647 (<https://www.graphpad.com/>). Data from different replicates were pooled directly and  
648 first tested for normality using D'Agostino-Pearson and Shapiro-Wilk tests. For normally  
649 distributed data, unpaired parametric Student's t-test is used for two-sample  
650 experiments and one-way ANOVA with Turkey post hoc test for three-sample or more  
651 experiments. Non-normally distributed data were analyzed using nonparametric tests,  
652 the Mann-Whitney test for two-sample experiments and the Kruskal-Wallis test with  
653 Dunn's multiple comparisons test for three or more samples experiments. For all graphs,  
654 unless otherwise stated, data are presented as mean and standard error of the mean  
655 (SEM) and statistical significance was accepted for p value < 0.05.

656

### 657 **Data availability**

658 Sequencing data will be available at GEO. All other data for this study are included in  
659 the manuscript and supporting files.

660

661 **Supplemental information**

662 Supplemental information includes 2 figures and 1 table.
